# Supplementary material for: Ammonium and Phosphate Recovery in a Three Chambered Microbial Electrolysis Cell: Towards Obtaining Struvite from Livestock Manure
Source: MDPI journal article supplement (doi:10.3390/pr9111916), 2021-10-27
Supplement: s1 [file s1]

# **Ammonium and Phosphate Recovery in a Three Chambered Microbial Electrolysis Cell: Towards Obtaining Struvite from Livestock Manure**

Míriam Cerrillo<sup>a\*</sup>, Laura Burgos<sup>a</sup>, Joan Noguerol<sup>a</sup>, Victor Riau<sup>a</sup>, August Bonmatí<sup>a\*</sup>.

<sup>a</sup> IRTA. GIRO. ctra. C-59, km 12,1. E-08140 Caldes de Montbui, Barcelona, Spain.

\* Correspondence: [miriam.cerrillo@irta.cat](mailto:miriam.cerrillo@irta.cat) (M.C.); [august.bonmati@irta.cat](mailto:august.bonmati@irta.cat) (A.B.)

## **Supporting Information**

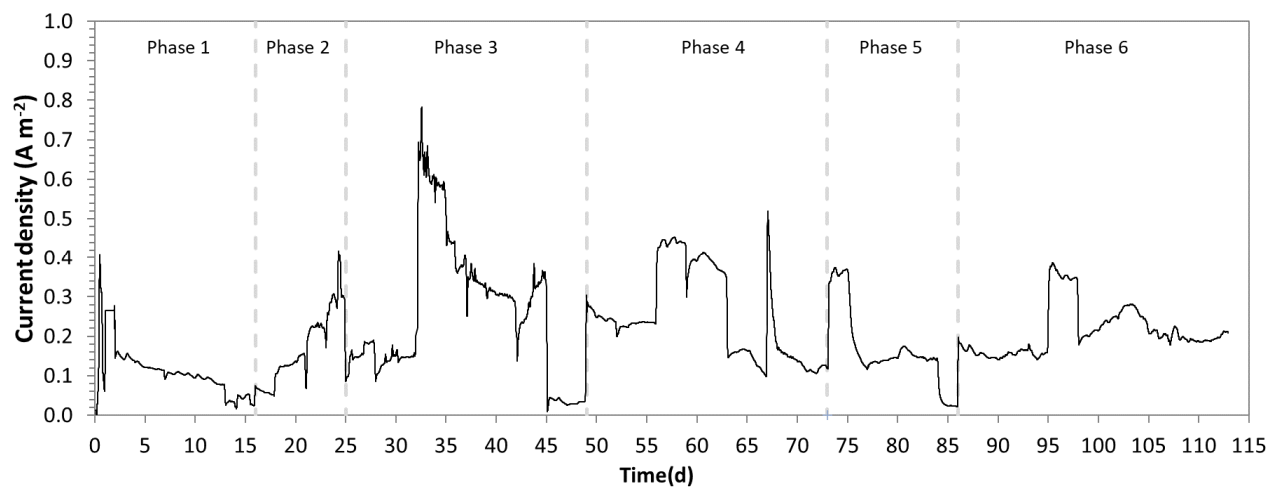

**Figure S1.** Current density produced in the MEC in the different phases of operation. Phase 1: not amended feeding was used; Phase 2: catholyte acidified to pH 6; Phase 3: catholyte acidified to pH 5; Phase 4: catholyte acidified to pH 5 and phosphate amended; Phase 5: phosphate amended catholyte; and Phase 6: phosphate amended anolyte.

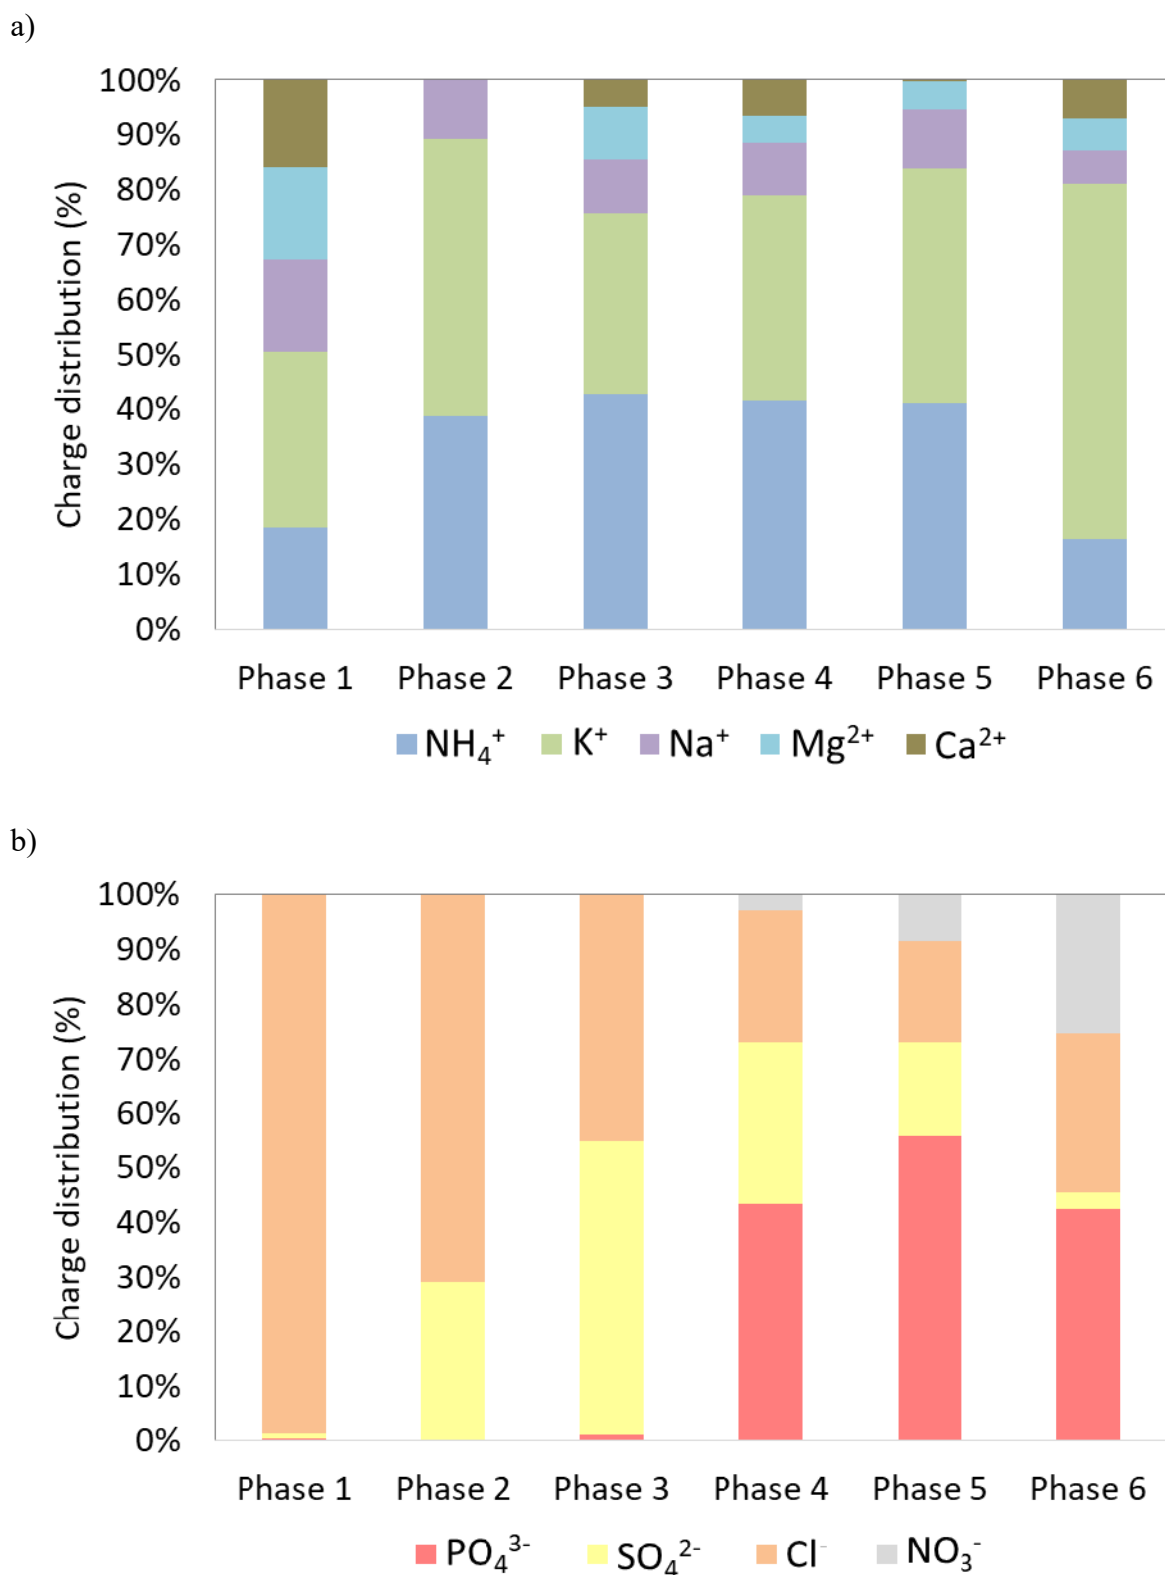

**Figure S2.** Charge distribution of the solutions recovered in each phase in the intermediate compartment a) cations and b) anions.

a)

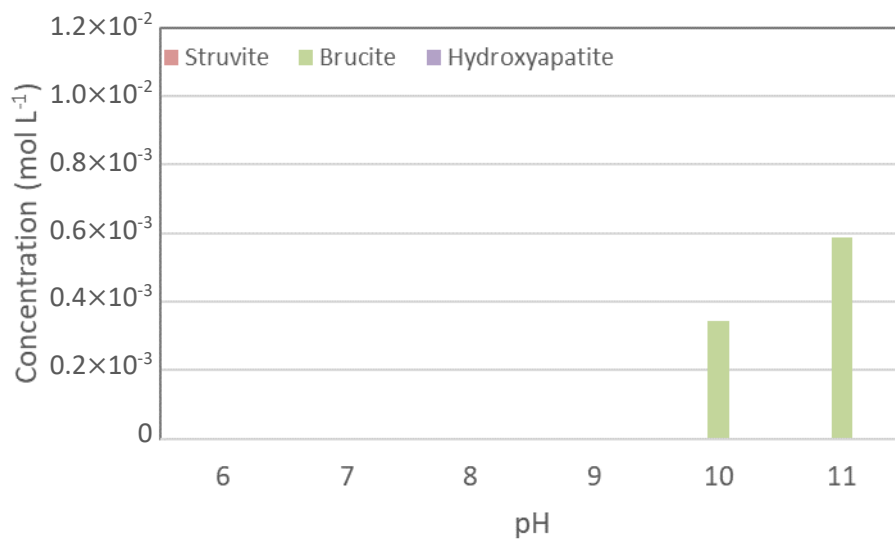

b)

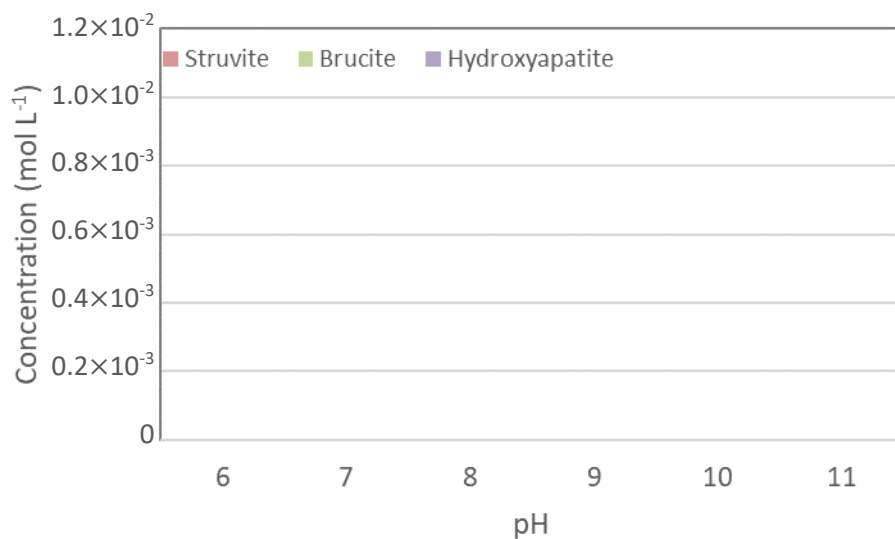

c)

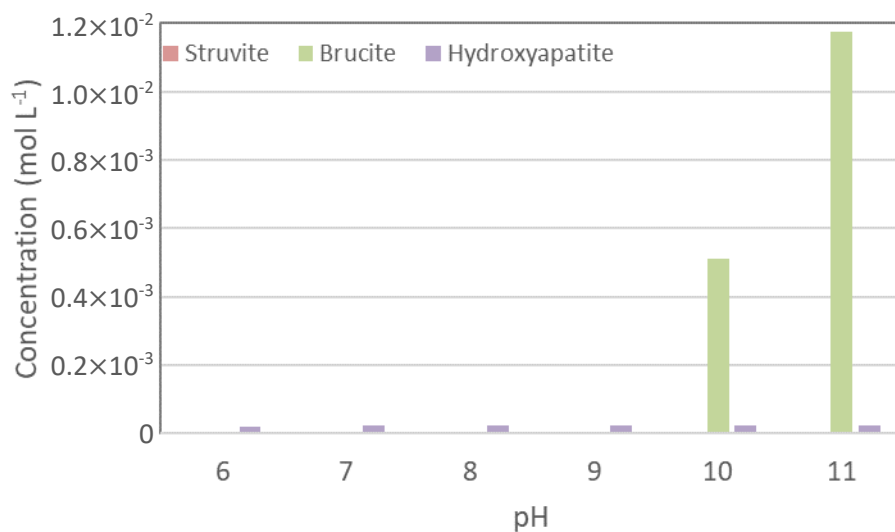

**Figure S3.** Visual Minteq output for the mathematical calculation of struvite and other salts precipitation when increasing pH from value 6 to 11 with each recovery solution obtained in the different operation phases. a) Phase 1: not amended feeding was used; b) Phase 2: catholyte acidified to pH 6; c) Phase 3: catholyte acidified to pH 5.

d)

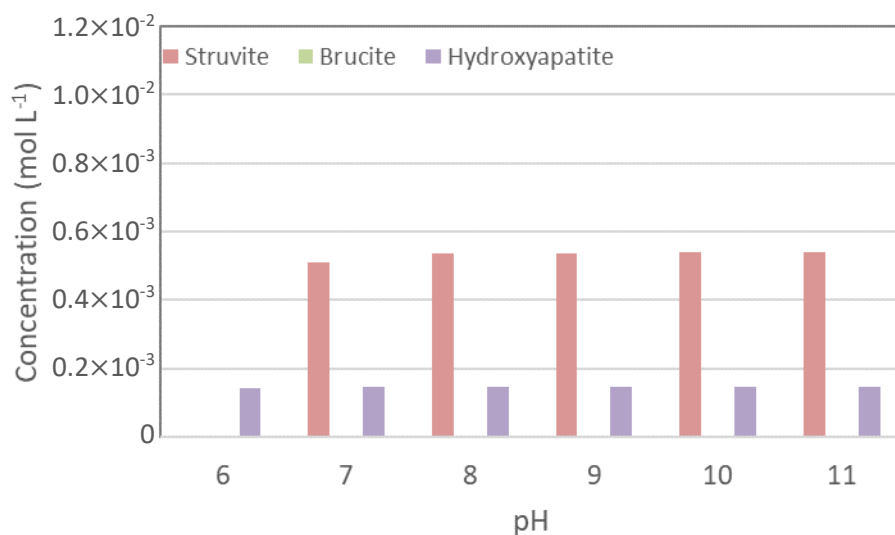

e)

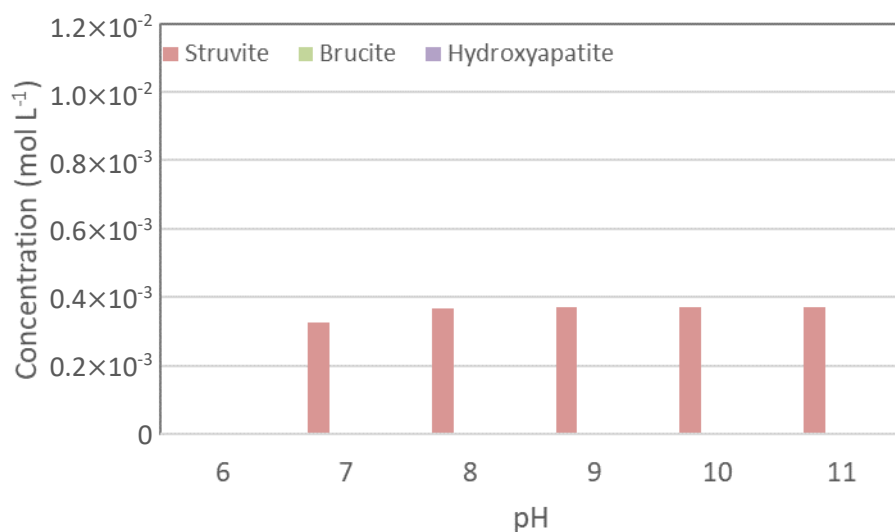

f)

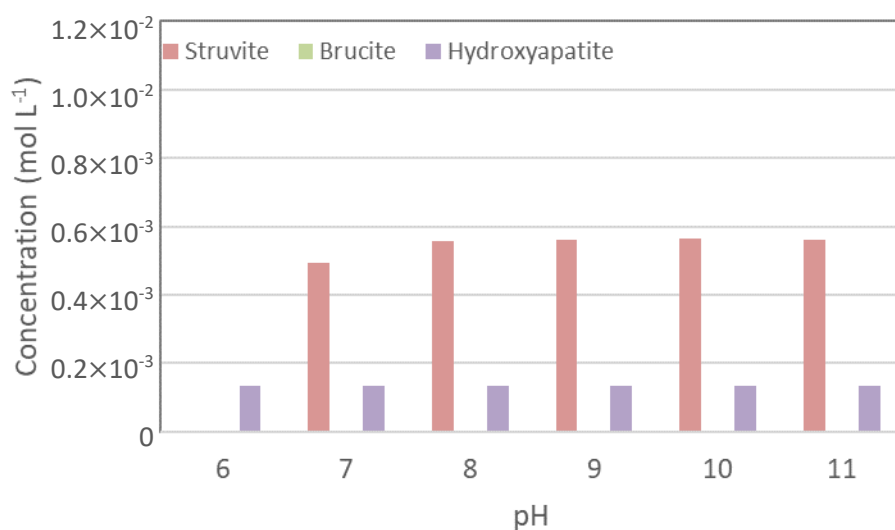

**Figure S3 cont.** Visual Minteq output for the mathematical calculation of struvite and other salts precipitation when increasing pH from value 6 to 11 with each recovery solution obtained in the different operation phases. d) Phase 4: catholyte acidified to pH 5 and phosphate amended; e) Phase 5: phosphate amended catholyte; and f) Phase 6: phosphate amended anolyte.

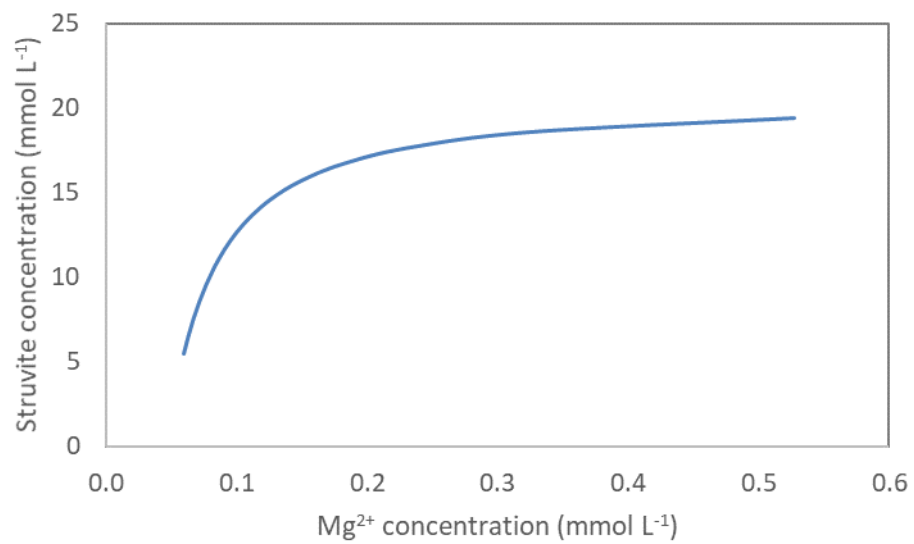

**Figure S4.** Visual Minteq output for the mathematical calculation of struvite obtained at pH 8 with the recovery solution of Phase 6 amended with increasing concentrations of magnesium.
