# Supplementary material for: Ammonium and Phosphate Recovery in a Three Chambered Microbial Electrolysis Cell: Towards Obtaining Struvite from Livestock Manure
Source: MDPI journal article supplement (doi:10.3390/pr9111916), 2021-10-27
Supplement: s1 [file s1]

Archive with 1 entries (1 files):
- processes-1419857-supplementary.pdf
